# Supplementary material
Source: MDPI journal article supplement (https://www.mdpi.com/2073-4395/13/1/252)
Supplement: s1 [file s1 › Figure_S1.pdf]

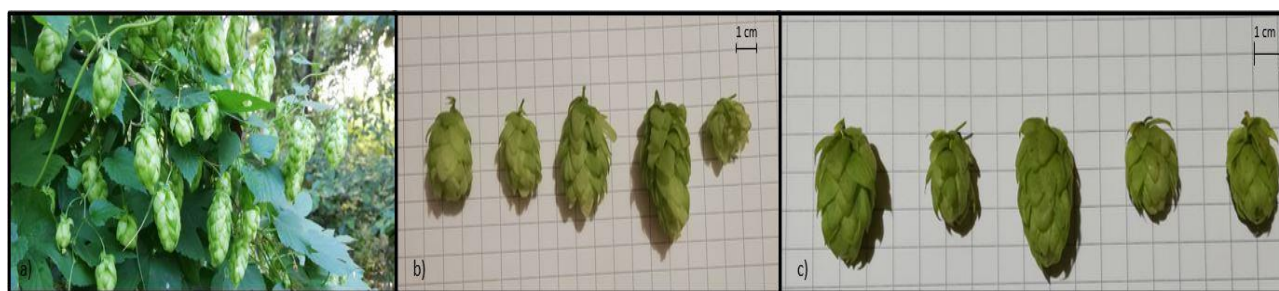

**Figure S1.** Plant and cones of Calabrian wild hops. **(a)** Wild hop plant; **(b)** fresh cones from Coscile area; **(c)** fresh cones from Corigliano area.
