# Supplementary material
Source: MDPI journal article supplement (https://www.mdpi.com/2073-4395/13/1/252)
Supplement: s1 [file s1 › Table S1.pdf]

**Table S1.** Morphological traits of the Calabrian hop populations.

| ID | Area | Name          | size | shape | diameter | SE       | length | SE       |
|----|------|---------------|------|-------|----------|----------|--------|----------|
| 1  | CS   | Coscile1      | 5    | 4     | 1.555    | 0.080614 | 2.68   | 0.186886 |
| 3  | CS   | Coscile2      | 5    | 4     | 1.515    | 0.060383 | 2.21   | 0.093161 |
| 6  | CS   | Coscile3      | 3    | 3     | 1.395    | 0.03515  | 2.075  | 0.080745 |
| 7  | CS   | Coscile4      | 5    | 4     | 1.68     | 0.056008 | 2.845  | 0.125546 |
| 9  | CS   | Coscile5      | 5    | 4     | 1.505    | 0.054035 | 2.405  | 0.104498 |
| 10 | CZ   | Brullì1       | 7    | 4     | 1.445    | 0.043815 | 3.005  | 0.179543 |
| 14 | CZ   | Brullì2       | 3    | 4     | 1.4      | 0.044129 | 2.015  | 0.06893  |
| 15 | CZ   | Brullì3       | 5    | 4     | 1.395    | 0.050511 | 2.24   | 0.108918 |
| 17 | RC   | COMET         | 7    | 4     | 1.478    | 0.027957 | 3.061  | 0.071297 |
| 20 | RC   | COLUMBIA      | 7    | 4     | 1.41     | 0.04471  | 2.746  | 0.122814 |
| 24 | CS   | Quattromiglia | 5    | 3     | 1.485    | 0.041849 | 2.285  | 0.07514  |
| 25 | CS   | Quattromiglia | 5    | 3     | 1.38     | 0.04389  | 2.275  | 0.095111 |
| 27 | CS   | Crati1        | 3    | 3     | 1.315    | 0.030153 | 1.855  | 0.04321  |
| 28 | CS   | Crati2        | 5    | 4     | 1.36     | 0.053014 | 2.22   | 0.128062 |
| 31 | VV   | Caruso        | 7    | 4     | 1.67     | 0.053852 | 3.275  | 0.124789 |
| 32 | VV   | Siviglia      | 7    | 3     | 1.779    | 0.057352 | 3.22   | 0.121525 |
| 35 | VV   | HERSBRUCKER   | 7    | 3     | 1.793    | 0.035407 | 3.311  | 0.100141 |
| 39 | VV   | FUGGLE        | 7    | 4     | 1.906    | 0.036273 | 3.883  | 0.068398 |
| 40 | CS   | Movigliano1   | 5    | 3     | 1.393    | 0.049885 | 2.179  | 0.094153 |
| 42 | CS   | Movigliano2   | 5    | 3     | 1.718    | 0.061508 | 2.538  | 0.109688 |
| 43 | CS   | Molarotta     | 7    | 4     | 1.78     | 0.029849 | 3.304  | 0.081673 |
| 46 | VV   | Pizzoni1      | 3    | 3     | 1.301    | 0.029835 | 1.849  | 0.043066 |
| 49 | VV   | Pizzoni2      | 3    | 3     | 1.375    | 0.031538 | 1.722  | 0.040105 |
