# Supplementary material
Source: MDPI journal article supplement (https://www.mdpi.com/2073-4395/13/1/252)
Supplement: s1 [file s1 › Table S2.pdf]

**Table S2.** Genetic diversity parameters among hop populations of the three Calabrian areas (CS, CZ and VV) based on SSR markers.

|               |             | <b>N</b> | <b>Ne</b> | <b>H</b> | <b>I</b> | <b>F</b> |
|---------------|-------------|----------|-----------|----------|----------|----------|
| <b>Pop-CS</b> | <i>Mean</i> | 11.875   | 5.033     | 0.823    | 1.743    | 0.080    |
| <b>Pop-CZ</b> | <i>Mean</i> | 4.750    | 2.993     | 0.702    | 1.156    | -0.015   |
| <b>Pop-VV</b> | <i>Mean</i> | 4.750    | 3.005     | 0.703    | 1.153    | 0.048    |

N, number of alleles; Ne, number of effective alleles; H, gene diversity; I, Shannon's information index; F, fixation index
